# Supplementary material
Source: PubMed Central journal article supplement (PMC11326515)
Supplement: NIHMS2015497-supplement-1.pdf [file NIHMS2015497-supplement-1.pdf]

**Supplemental Table. Multivariable Logistic Regression Analysis of Demographic and Clinical Characteristics associated with UTI among Infants with at Least One Urine Culture Obtained**

| <b>Characteristics</b>                                                   | <b>OR (95% CI)</b> | <b>p-value</b> |
|--------------------------------------------------------------------------|--------------------|----------------|
| Sex                                                                      |                    |                |
| Female                                                                   | (Reference)        | —              |
| Male                                                                     | 2.30 (2.15–2.45)   | < 0.001        |
| Gestational age (weeks)                                                  |                    |                |
| ≤24                                                                      | 1.33 (1.19-1.48)   | <0.001         |
| 25–28                                                                    | 1.24 (1.14-1.35)   | <0.001         |
| 29–32                                                                    | (Reference)        | —              |
| 5-minute Apgar Score                                                     |                    |                |
| 0–3                                                                      | 0.97 (0.86-1.10)   | 0.62           |
| 4–6                                                                      | 0.99 (0.91-1.07)   | 0.80           |
| 7–10                                                                     | (Reference)        | —              |
| Vaginal delivery                                                         | 1.18 (1.10-1.27)   | <0.001         |
| Prenatal steroids                                                        | 1.18 (1.08-1.29)   | <0.001         |
| Length of hospitalization (days)                                         | 1.01 (1.01-1.01)   | <0.001         |
| CI = confidence interval; OR = odds ratio; UTI = urinary tract infection |                    |                |
